# Supplementary material for: Preparation, crystal structures, thermal decompositions and explosive properties of two new high-nitrogen azide ethylenediamine energetic compounds
Source: Royal Society of Chemistry journal article supplement (doi:10.1039/c2nj40887b), 2012-11-29
Supplement: c2nj40887b.pdf [file c2nj40887b.pdf]

## Supporting Information

Table 1 Hydrogen bond lengths (Å) and bond angles (°) for **1** and **2**

| D–H···A           | d(D–H) | d(H···A) | d(D···A) | ∠D–H···A |
|-------------------|--------|----------|----------|----------|
| <b>1</b>          |        |          |          |          |
| N1–H1A···N7 #1    | 0.9000 | 2.5800   | 3.4177   | 155      |
| N1–H1A···N8 #1    | 0.9000 | 2.3800   | 3.1576   | 145.00   |
| N1–H1B···N11 #2   | 0.9000 | 2.2100   | 3.0565   | 156.00   |
| N2–H2A···N11      | 0.9000 | 2.2500   | 3.1113   | 159.00   |
| N2–H2B···N8 #3    | 0.9000 | 2.3100   | 3.0989   | 146.00   |
| N9–H9A···N4 #4    | 0.9000 | 2.4900   | 3.2995   | 150.00   |
| N9–H9B···N4 #4    | 0.9000 | 2.4300   | 3.2006   | 144.00   |
| N10–H10A···N13 #5 | 0.9000 | 2.3000   | 3.1284   | 153.00   |
| N10–H10A···N5     | 0.9000 | 2.4000   | 3.2402   | 155.00   |
| <b>2</b>          |        |          |          |          |
| N1–H1A···O1 #5    | 0.9100 | 2.1200   | 2.9812   | 156.00   |
| N1–H1B···O1 #1    | 0.8700 | 2.3400   | 3.1305   | 152.00   |
| N2–H1B···N3 #6    | 0.8900 | 2.4800   | 3.2513   | 144.00   |
| N2–H1B···O2 #7    | 0.8900 | 2.2400   | 2.8462   | 125.00   |
| C1–H1A···N5 #8    | 0.9900 | 2.4500   | 3.3325   | 148.00   |

Symmetry transformations: #1  $1/2-x, 1/2-y, -z$ ; #2  $x, -1+y, z$ ; #3  $1/2-x, 3/2-y, -z$ ; #4  $x, 1+y, z$ ;

#5  $1/2-x, -1/2+y, 1/2-z$ ; #6  $-x, 1-y, -z$ ; #7  $1/2+x, 1/2+y, z$ ; #8  $1/2+x, 1/2-y, 1/2+z$

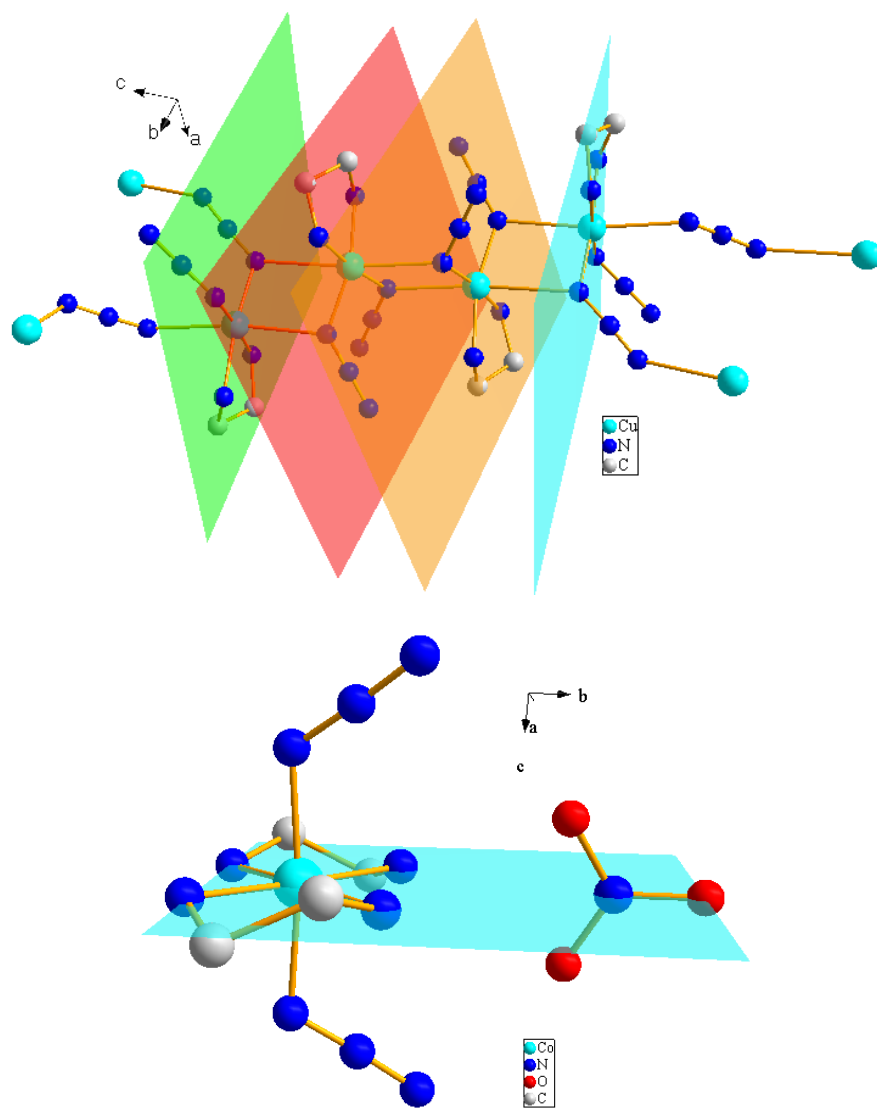

Figure 1 The octahedral coordination structures and the coplanar structures of metal cations in compound 1 and 2
